# Supplementary material for: Molecular Reconstruction of Extinct LINE-1 Elements and Their Interaction with Nonautonomous Elements
Source: PubMed Central journal article supplement — Mol Biol Evol. 2012 Aug 23;30(1):88–99. doi: 10.1093/molbev/mss202 (PMC3525338; doi:10.1093/molbev/mss202), 2012-08-23
Supplement: supp_mss202_Supplemental_Fig_S1.pdf [file supp_mss202_Supplemental_Fig_S1.pdf]

|                     |                                                                                                                                                                 |      |
|---------------------|-----------------------------------------------------------------------------------------------------------------------------------------------------------------|------|
| ORF2 PA8            | MTGSNSHI T I L T L N V N G L N A P I K R H R L A N W I K S Q D P S V C C I Q E T H L M C K D T H R L K I K G W R N I Y Q A N G K Q K K A G V A I L V S D        | 80   |
| ORF2 PA (corrected) | MTGSNSHI T I L T L N V N G L N A P I K R H R L A N W I K S Q D P S V C C I Q E T H L T C K D T H R L K I K G W R N I Y Q A N G K Q K K A G V A I L V S D        | 80   |
| ORF2 PA8            | K T D F K P T K I K K D K E G H Y I M V N G S I Q Q E E L T I L N I Y A P N T G A P R F I K Q V L R D L Q R D L D S H T I I V G D F N T P L S I L D R S T R Q K | 160  |
| ORF2 PA (corrected) | K T D F K P T K I K K D K E G H Y I M V N G S M Q Q E E L T I L N I Y A P N T G A P R F I K Q V L R D L Q R D L D S H T I I V G D F N T P L S I L D R S T R Q K | 160  |
| ORF2 PA8            | I N K D I Q D L N S A L D Q V D L I D I Y R T L H P K S T E Y T F F S A P H S T Y S K I D H I I G S K T L L S K C K R T E I I T N S L S D H S A I K L E L R I K | 240  |
| ORF2 PA (corrected) | I N K D I Q D L N S A L D Q V D L I D I Y R T L H P K S T E Y T F F S A P H S T Y S K I D H I I G S K T L L S K C K R T E I I T N S L S D H S A I K L E L R I K | 240  |
| ORF2 PA8            | K L T Q N R T T T W K L N N L L L N D Y W N N E I K A E I K K F F E T N E N K E T T Y Q N L W D T A K A V L R G K F I A L N A H I R K L E R S Q I D T L T S Q   | 320  |
| ORF2 PA (corrected) | K L T Q N R T T T W K L N N L L L N D Y W N N E I K A E I K K F F E T N E N K E T T Y Q N L W D T A K A V L R G K F I A L N A H I R K L E R S Q I D T L T S Q   | 320  |
| ORF2 PA8            | L K E L E K Q E Q T N S K A S R R Q E I T K I R A E M K E I E T R K T L Q K I N E S R S W F F E K I N K I D C P L A R L I K K K R E K N Q I D T I K N D K G D I | 400  |
| ORF2 PA (corrected) | L K E L E K Q E Q T N S K A S R R Q E I T K I R A E L K E I E T R K T L Q K I N E S R S W F F E K I N K I D R P L A R L I K K K R E K N Q I D T I K N D K G D I | 400  |
| ORF2 PA8            | T T D P T E I Q T T I R E Y Y K H L Y A N K L E N L E E M D K F L D T Y T L P R L N Q E E V E S L N R P I T S S E I E A V I N S L P T K K S P G P D G F T A E F | 480  |
| ORF2 PA (corrected) | T T D P T E I Q T T I R E Y Y K H L Y A N K L E N L E E M D K F L D T Y T L P R L N Q E E V E S L N R P I T S S E I E A V I N S L P T K K S P G P D G F T A E F | 480  |
| ORF2 PA8            | Y Q R Y K E E L V P F L L K L F Q T I E K E G L L P N S F Y E A S I I L I P K P G R D T T K K E N F R P I S L M N I D A K I L N K I L A N R I Q Q H I K K L I H | 560  |
| ORF2 PA (corrected) | Y Q R Y K E E L V P F L L K L F Q T I E K E G L L P N S F Y E A S I I L I P K P G R D T T K K E N F R P I S L M N I D A K I L N K I L A N R I Q Q H I K K L I H | 560  |
| ORF2 PA8            | H D Q V G F I P G M Q G W F N I R K S I N V I H H I N R T N D K N H M I S I D A E K A F D K I Q H P F M L K T L N K L G I D G T Y L K I I R A I Y D K P I A N   | 640  |
| ORF2 PA (corrected) | H D Q V G F I P G M Q G W F N I R K S I N V I H H I N R T N D K N H M I S I D A E K A F D K I Q H P F M L K T L N K L G I D G T Y L K I I R A I Y D K P I A N   | 640  |
| ORF2 PA8            | I I L N G Q K L E A F P L K T G T R Q G C P L S P L L F N I V L E V L A R A I R O E K E I K G I Q I G R E E V K L S L F A D D M I V Y L E N P I V S A Q K L L K | 720  |
| ORF2 PA (corrected) | I I L N G Q K L E A F P L K T G T R Q G C P L S P L L F N I V L E V L A R A I R O E K E I K G I Q I G R E E V K L S L F A D D M I V Y L E N P I V S A Q K L L K | 720  |
| ORF2 PA8            | L I S N F S K V S G Y K I N V Q K S Q A F L Y T N N R Q A E S Q I M N E L P F T I A T K R I K Y L G I Q L T R D V K D L F K E N Y K P L L K E I R E D T N K W K | 800  |
| ORF2 PA (corrected) | L I S N F S K V S G Y K I N V Q K S Q A F L Y T N N R Q A E S Q I M S E L P F T I A T K R I K Y L G I Q L T R D V K D L F K E N Y K P L L K E I R E D T N K W K | 800  |
| ORF2 PA8            | N I P C S W G R I N I V K M A I L P K V I Y R F N A I P I K L P L T F F T E L E K T T L N F I W N Q K R A R I A K T I L S K K N K A G G I T L P D F K L Y Y K   | 880  |
| ORF2 PA (corrected) | N I P C S W G R I N I V K M A I L P K V I Y R F N A I P I K L P L T F F T E L E K T T L N F I W N Q K R A R I A K T I L S K K N K A G G I T L P D F K L Y Y K   | 880  |
| ORF2 PA8            | A T V T K T A W Y W Q N R Y I D Q W N R T E T S E I T P H I Y N H L I F N K P D K N K W G K D S L F N K W C W E N W L A I C R K L K L D P F L T P Y T K I N     | 960  |
| ORF2 PA (corrected) | A T V T K T A W Y W Q N R Y I D Q W N R T E T S E I T P H I Y N H L I F D K P D K N K W G K D S L F N K W C W E N W L A I C R K L K L D P F L T P Y T K I N     | 960  |
| ORF2 PA8            | S R W K D L N V K P K T I K T L E E N L G N T I Q D I G M G K D F M T K T P K A M A T K A K I D K W D L I K L K S F C T A K E T I I R V N R Q P T E W E K I F   | 1040 |
| ORF2 PA (corrected) | S R W K D L N V K P K T I K T L E E N L G N T I Q D I G M G K D F M T K T P K A M A T K A K I D K W D L I K L K S F C T A K E T I I R V N R Q P T E W E K I F   | 1040 |
| ORF2 PA8            | A I Y P S D K G L I S R I Y K E L K Q I Y K K K T N N P I K K W A K D M N R H F S K E D I Y A A N K H M K K S S S L V I R E M Q I K T T M R Y H L T P V R M A   | 1120 |
| ORF2 PA (corrected) | A I Y P S D K G L I S R I Y K E L K Q I Y K K K T N N P I K K W A K D M N R H F S K E D I Y A A N K H M K K S S S L V I R E M Q I K T T M R Y H L T P V R M A   | 1120 |
| ORF2 PA8            | I I K K S G N N R C W R G C G E I G T L L H C W W E C K L V Q P L W K T V W R F L K D L E P E I P F D P A I P L L G I Y P K D Y K S F Y Y K D T C T R M F I A A | 1200 |
| ORF2 PA (corrected) | I I K K S G N N R C W R G C G E I G T L L H C W W E C K L V Q P L W K T V W R F L K D L E P E I P F D P A I P L L G I Y P K D Y K S F Y Y K D T C T R M F I A A | 1200 |
| ORF2 PA8            | L F T I A K T W N Q P K C P S M I D W I K K M W H I Y T M E Y Y A A I K R N E F M S F A G T W M K L E A I I L S K L T Q E Q K T K H R M F S L I S G S           | 1275 |
| ORF2 PA (corrected) | L F T I A K T W N Q P K C P S M I D W I K K M W H I Y T M E Y Y A A I K R N E F M S F A G T W M K L E A I I L S K L T Q E Q K T K H R M F S L I S G S           | 1275 |

**Supplemental Figure S1.** The alignment of the predicted amino acid sequence of the available consensus sequence of the L1PA8 ORF2 protein and the corrected L1PA8 ORF2 protein is shown. The amino acids selected for modification are highlighted by black boxes.
