# Supplementary material for: Molecular Reconstruction of Extinct LINE-1 Elements and Their Interaction with Nonautonomous Elements
Source: PubMed Central journal article supplement — Mol Biol Evol. 2012 Aug 23;30(1):88–99. doi: 10.1093/molbev/mss202 (PMC3525338; doi:10.1093/molbev/mss202), 2012-08-23
Supplement: supp_mss202_Supplemental_Fig_S2.pdf [file supp_mss202_Supplemental_Fig_S2.pdf]

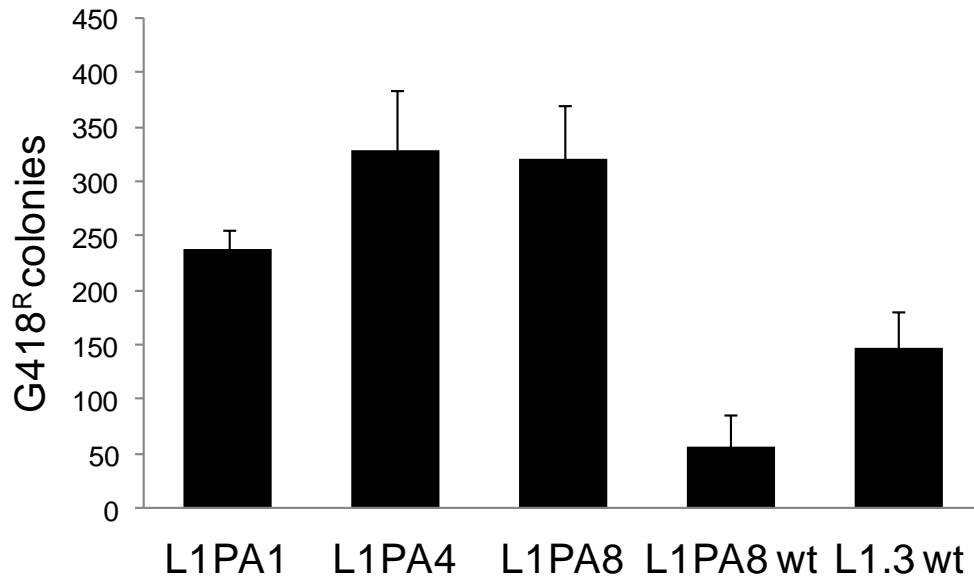

**Supplemental Figure S2.** Retrotransposition results of the tagged L1 constructs. HeLa cells (ATCC CCL2) were seeded in T25 flasks at a density of  $2 \times 10^5$  cells per well. The cells were transfected with 0.5  $\mu\text{g}$  of the L1 tagged vector (pBSL1PA1, pBSL1PA4, pBSL1PA4, JM101/L.13 or pBSL1PA8wt).
