# Supplementary material for: Molecular Reconstruction of Extinct LINE-1 Elements and Their Interaction with Nonautonomous Elements
Source: PubMed Central journal article supplement — Mol Biol Evol. 2012 Aug 23;30(1):88–99. doi: 10.1093/molbev/mss202 (PMC3525338; doi:10.1093/molbev/mss202), 2012-08-23
Supplement: supp_mss202_Supplemental_Fig_S3.pdf [file supp_mss202_Supplemental_Fig_S3.pdf]

**A**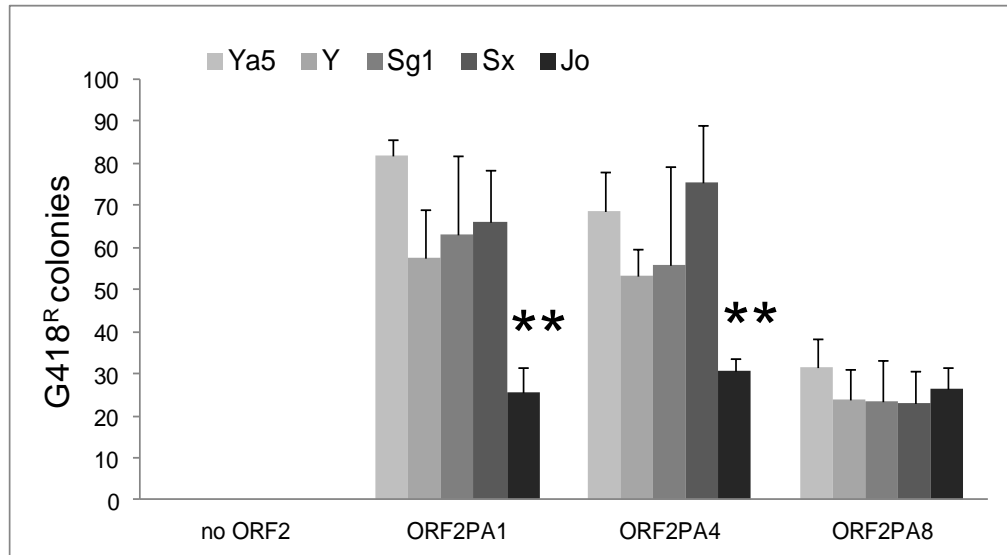**B**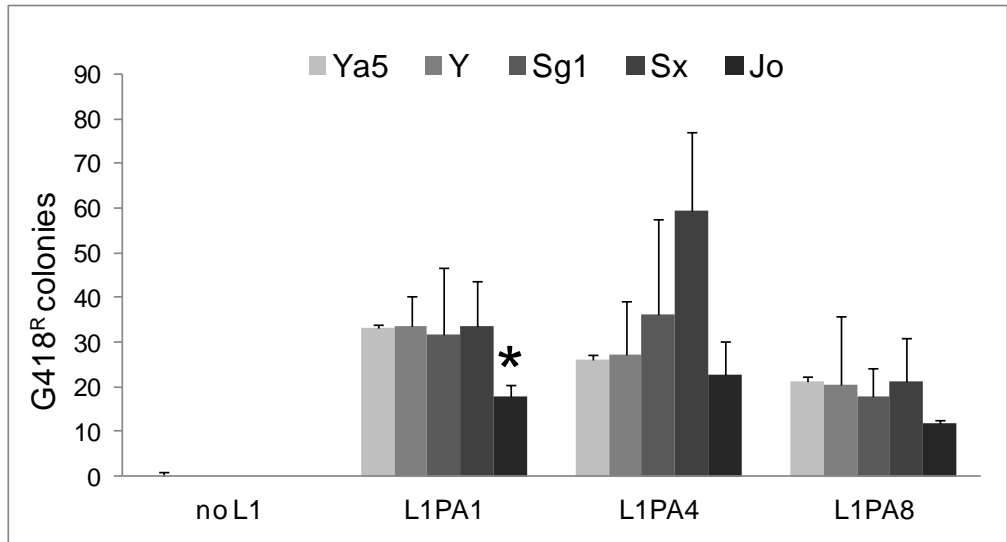

**Supplemental Figure S3.** Retrotransposition results of the tagged consensus Alu subfamilies driven by (A) the ORF2 protein or (B) the full length L1 of the different L1 subfamilies. HeLa cells (ATCC CCL2) were seeded in 6 well plates at a density of  $1.0 \times 10^5$  cells per well. The cells were transfected with 1  $\mu$ g of the ORF2 expression vector (pBudORF2PA1, pBudORF2PA4 or pBudORF2PA8) or 1  $\mu$ g of the L1 vector (pBSL1PA1, pBSL1PA4 or pBSL1PA8) and 0.5  $\mu$ g of the tagged Alu construct. Under these conditions no colonies were observed when no supplementation of L1 factors was supplemented. Asterisks indicate that the retrotransposition of the older Alu element (AluJo) is significantly lower than the modern/young AluYa5, paired t-test, \*\*p < 0.001; \* p=0.037.
