# Supplementary material for: Molecular Reconstruction of Extinct LINE-1 Elements and Their Interaction with Nonautonomous Elements
Source: PubMed Central journal article supplement — Mol Biol Evol. 2012 Aug 23;30(1):88–99. doi: 10.1093/molbev/mss202 (PMC3525338; doi:10.1093/molbev/mss202), 2012-08-23
Supplement: supp_mss202_Supplemental_FigS4.pdf [file supp_mss202_Supplemental_FigS4.pdf]

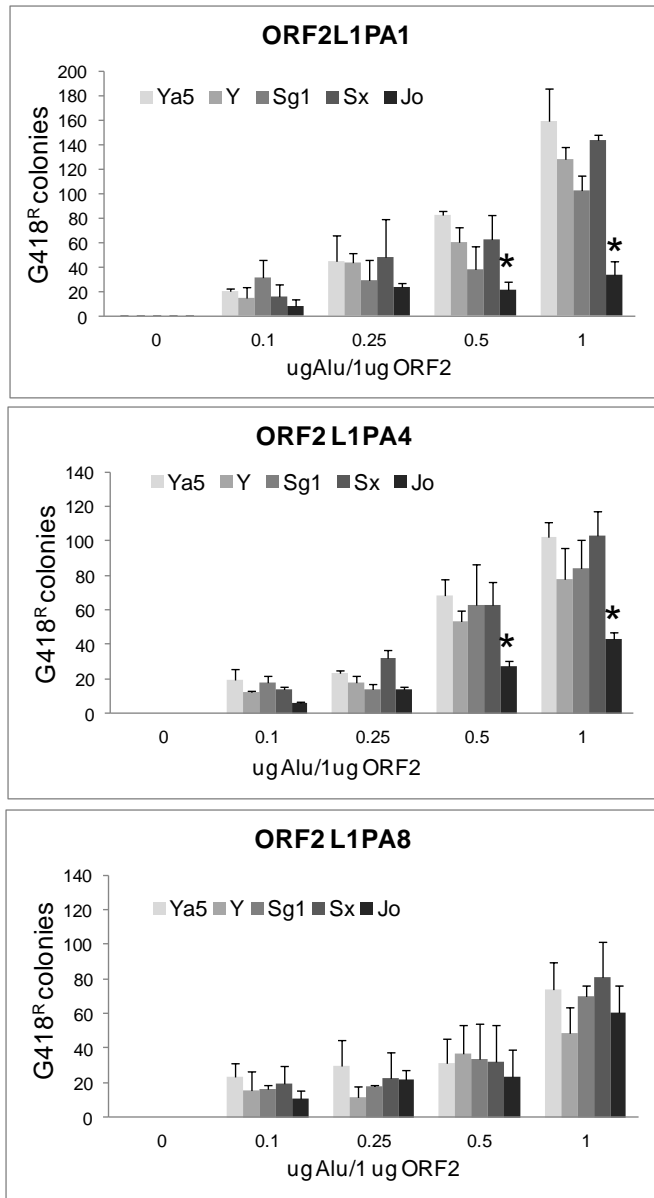

**Supplemental Figure S4.** Representative retrotransposition results of the tagged consensus Alu subfamilies driven by the ORF2 protein of the different L1 subfamilies. HeLa cells (ATCC CCL2) were seeded in 6 well plates at a density of  $1.0 \times 10^5$  cells per well. The cells were transfected with  $1 \mu\text{g}$  of the ORF2 expression vector (pBudORF2PA1, pBudORF2PA4 or pBudORF2PA8) and varying amounts of the tagged Alu subfamily constructs ( $0 \mu\text{g} - 1 \mu\text{g}$ ). Under these conditions no colonies were observed when ORF2 was supplemented. Asterisks indicate that the retrotransposition of the older Alu element (AluJo) is significantly lower than the modern/young AluYa5, paired t-test,  $p < 0.001$
